# Supplementary material for: SIMPLEX: Cloud-Enabled Pipeline for the Comprehensive Analysis of Exome Sequencing Data
Source: PLOS journal article supplement (doi:10.1371/journal.pone.0041948), 2012-08-01
Supplement: S1 (10.1371/journal.pone.0041948.s001) [file journal.pone.0041948.s001]

**Supplementary Table 1: SIMPLEX parameter description**

| Required pipeline parameters |                    |                                       |                                                                                                                                                                                                                      |               |
|------------------------------|--------------------|---------------------------------------|----------------------------------------------------------------------------------------------------------------------------------------------------------------------------------------------------------------------|---------------|
| Short option                 | Long option        | Value                                 | Description                                                                                                                                                                                                          | Default value |
| -c                           | --command          | exomeSE   exomePE                     | defines if single read or paired end data is analyzed                                                                                                                                                                | -             |
| -od                          | --outputdirectory  | text                                  | path to output directory where pipeline results are stored                                                                                                                                                           | -             |
| -genP                        | --genome-prefix    | hg18   hg18.color   hg19   hg19.color | prefix specifying the reference genome                                                                                                                                                                               | -             |
| -l                           | --input            | text                                  | comma separated list of fastq files to analyze. If paired end data is given, the file names must contain _R1 or _R2 (for first reads in pair/ second reads in pair) before the format suffix (.fq.gz] or .fastq.gz]) | -             |
| -sfeb                        | --sfeb             | text                                  | path to bed file specifying the exome                                                                                                                                                                                | -             |
| -dsP                         | --dsP              | double                                | percentage to distinguish between homo- and heterozygous DIPs                                                                                                                                                        | -             |
| -k                           | --clusterpropsfile | text                                  | configure access to cluster: path to the clusterproperties file                                                                                                                                                      | -             |

| Optional pipeline parameters |                        |        |                                                                                                                                          |               |
|------------------------------|------------------------|--------|------------------------------------------------------------------------------------------------------------------------------------------|---------------|
| Short option                 | Long option            | Type   | Description                                                                                                                              | Default value |
| -CS                          | --colospace            | switch | if defined, input files are assumed to be color space csfasta files                                                                      | -             |
| -Q                           | --qualfiles            | text   | list of the quality files in case colospace csfasta files are used as input. Same rules for file separation apply as for the input files | -             |
| -sfecs                       | --sf-exon-cs           | switch | strand aware exome filtering                                                                                                             | -             |
| -gaR                         | --ga-region            | text   | defines the region of interest in form of <chrom>:<start>-<end>                                                                          | -             |
| -ac                          | --autocleanup-disabled | switch | leaves all files on the cluster for later cleanup                                                                                        | -             |

| FASTQ conversion parameters |                |                   |                          |               |
|-----------------------------|----------------|-------------------|--------------------------|---------------|
| Short option                | Long option    | Type              | Description              | Default value |
| -fqc                        | --fq-convert   | switch            | enables fastq conversion | -             |
| -cf                         | --convert-from | illumina   solexa | FASTQ input file format  | illumina      |

| Quality statistics parameters |                      |                            |                                                                                                                                                |               |
|-------------------------------|----------------------|----------------------------|------------------------------------------------------------------------------------------------------------------------------------------------|---------------|
| Short option                  | Long option          | Type                       | Description                                                                                                                                    | Default value |
| -d                            | --detailed-results   | switch                     | if given, intermediate results (like parsing results) are fetched                                                                              | -             |
| -ml                           | --max-read-length    | integer                    | length of the longest sequence read (needed for parsing)                                                                                       | 512           |
| -qo                           | --qv-offset          | integer                    | FASTQ ASCII encoding offset                                                                                                                    | 33            |
| -qr                           | --qv-range           | integer                    | max FASTQ Phred quality value                                                                                                                  | 94            |
| -r                            | --resolution         | integer                    | for the quality report generation, eps figures are converted into pngs (due to file sizes). This parameter defines the png's resolution in dpi | 500           |
| -sc                           | --statistics-command | raw_report   filter_report | comma separated list that defines which fastqstatistics should be calculated                                                                   | -             |

**Supplementary Table 1: SIMPLEX parameter description**

| FASTQ read trimmer parameters |                      |         |                                                            |               |
|-------------------------------|----------------------|---------|------------------------------------------------------------|---------------|
| Short option                  | Long option          | Type    | Description                                                | Default value |
| -ftl                          | --ft-len             | integer | read length to be trimmed to                               | -             |
| -ftlfp                        | --ft-len-five-prime  | integer | number of bp to be trimmed at 5' position                  | 0             |
| -ftltp                        | --ft-len-three-prime | integer | number of bp to be trimmed at 3' position                  | 0             |
| -ftq                          | --ft-qual            | integer | numeric quality value to be trimmed in the quality string. | -             |
| -ftS                          | --ft-seq             | char    | character to be trimmed in the sequence string.            | -             |

| FASTQ read filter parameters |             |                |                                                                                                                                                                                                |               |
|------------------------------|-------------|----------------|------------------------------------------------------------------------------------------------------------------------------------------------------------------------------------------------|---------------|
| Short option                 | Long option | Type           | Description                                                                                                                                                                                    | Default value |
| -ffqf                        | --ff-qf     | double/integer | maximum amount of allowed values of the specified quality value in the read. <i>Double</i> between 0 and 1 are treated as percent, otherwise <i>integer</i> (=total amount of Ns) is expected. | -             |
| -ffqv                        | --ff-qv     | integer        | numerical quality value to be filtered                                                                                                                                                         | -             |
| -M                           | --maxl      | integer        | maximal length of a sequence                                                                                                                                                                   | -             |
| -m                           | --minl      | integer        | minimal length of a sequence                                                                                                                                                                   | -             |
| -N                           | --nmax      | double/integer | maximum amount of allowed Ns in a sequence. <i>Double</i> between 0 and 1 are treated as percent, otherwise <i>integer</i> (=total amount of Ns) is expected.                                  | -             |

| Bwa aln parameters |             |                |                                                                                                                                                                                                                                                    |               |
|--------------------|-------------|----------------|----------------------------------------------------------------------------------------------------------------------------------------------------------------------------------------------------------------------------------------------------|---------------|
| Short option       | Long option | Type           | Description                                                                                                                                                                                                                                        | Default value |
| -bwaad             | --bwaad     | integer        | disallow a long deletion within <i>integer</i> bp towards the 3'-end                                                                                                                                                                               | 16            |
| -bwaae             | --bwaae     | integer        | maximum number of gap extensions, -1 for k-difference mode (disallowing long gaps)                                                                                                                                                                 | -1            |
| -bwaaE             | --bwaaE     | integer        | gap extension penalty                                                                                                                                                                                                                              | 4             |
| -bwaai             | --bwaai     | integer        | disallow an indel within <i>integer</i> bp towards the ends                                                                                                                                                                                        | 5             |
| -bwaak             | --bwaak     | integer        | maximum edit distance in the seed                                                                                                                                                                                                                  | 2             |
| -bwaal             | --bwaal     | integer        | take the first <i>integer</i> subsequence as seed. If <i>integer</i> is larger than the query sequence, seeding will be disabled. For long reads, this option is typically ranged from 25 to 32 for 'bwaak-2'.                                     | inf           |
| -bwaaM             | --bwaaM     | integer        | mismatch penalty. BWA will not search for suboptimal hits with a score lower than (bestScore- <i>integer</i> ).                                                                                                                                    | 3             |
| -bwaan             | --bwaan     | double/integer | maximum edit distance if the value is <i>integer</i> , or the fraction of missing alignments given 2% uniform base error rate if <i>double</i> . In the latter case, the maximum edit distance is automatically chosen for different read lengths. | 0.04          |
| -bwaaN             | --bwaaN     | switch         | disable interactive search. All hits with no more than <i>bwaan</i> differences will be found. This mode is much slower than the default.                                                                                                          | -             |
| -bwaao             | --bwaao     | integer        | maximum number of gap opens                                                                                                                                                                                                                        | 1             |

**Supplementary Table 1: SIMPLEX parameter description**

|        |         |         |                                                                                                                                                                                                                                                                       |    |
|--------|---------|---------|-----------------------------------------------------------------------------------------------------------------------------------------------------------------------------------------------------------------------------------------------------------------------|----|
| -bwaaO | --bwaaO | integer | gap open penalty                                                                                                                                                                                                                                                      | 11 |
| -bwaag | --bwaag | integer | parameter for read trimming. BWA trims a read down to $\text{argmax}_x \{\sum_{i=0}^{x-1} (q_i - q_{i+1})\}$ if $q_x < \text{integer}$ where $l$ is the original read length.                                                                                         | 0  |
| -bwaar | --bwaar | integer | proceed with suboptimal alignments if there are no more than <i>integer</i> equally best hits. This option only affects paired-end mapping. Increasing this threshold helps to improve the pairing accuracy at the cost of speed, especially for short reads (~32bp). | 30 |

| Bwa samse parameters |             |         |                                                                                                                                                              |               |
|----------------------|-------------|---------|--------------------------------------------------------------------------------------------------------------------------------------------------------------|---------------|
| Short option         | Long option | Type    | Description                                                                                                                                                  | Default value |
| -bwassn              | --bwassn    | integer | maximum number of alignments to output in the XA tag for reads paired properly. If a read has more than <i>integer</i> hits, the XA tag will not be written. | 3             |

| Bwa sampe parameters |             |         |                                                                                                                                                                                     |               |
|----------------------|-------------|---------|-------------------------------------------------------------------------------------------------------------------------------------------------------------------------------------|---------------|
| Short option         | Long option | Type    | Description                                                                                                                                                                         | Default value |
| -bwaspa              | --bwaspa    | switch  | disable insert size estimate (force -bwasps)                                                                                                                                        | -             |
| -bwaspa              | --bwaspa    | integer | maximum insert size                                                                                                                                                                 | 500           |
| -bwaspc              | --bwaspc    | double  | prior of chimeric rate                                                                                                                                                              | 0.00001       |
| -bwaspn              | --bwaspn    | integer | maximum number of alignments to output in the XA tag for reads paired properly. If a read has more than <i>integer</i> hits, the XA tag will not be written.                        | 3             |
| -bwaspn              | --bwaspn    | integer | maximum number of alignments to output in the XA tag for discordant read pairs (excluding singletons). If a read has more than <i>integer</i> hits, the XA tag will not be written. | 10            |
| -bwaspo              | --bwaspo    | integer | maximum occurrences for one end                                                                                                                                                     | 100000        |
| -bwaspp              | --bwaspp    | switch  | preload index into memory (for base-space reads only)                                                                                                                               | -             |
| -bwasps              | --bwasps    | switch  | disable Smith-Waterman for the unmapped mate                                                                                                                                        | -             |

| Local realignment parameters |                   |               |                                                                                                                                             |               |
|------------------------------|-------------------|---------------|---------------------------------------------------------------------------------------------------------------------------------------------|---------------|
| Short option                 | Long option       | Type          | Description                                                                                                                                 | Default value |
| -mlret                       | --mlr-entropy-thr | double        | percentage of mismatching base quality scores at a position to be considered having high entropy.                                           | 0.15          |
| -mlrid                       | --mlr-indels      | chr:start-end | list of already known indels                                                                                                                | dbSNP indels  |
| -mlrko                       | --mlr-knowns-only | switch        | don't run Smith-Waterman to generate alternate consenses; use only known indels provided as RODs for constructing the alternate references. | -             |

**Supplementary Table 1: SIMPLEX parameter description**

|         |                         |             |                                                                                                                                                                                                                                                                                                                                                                    |      |
|---------|-------------------------|-------------|--------------------------------------------------------------------------------------------------------------------------------------------------------------------------------------------------------------------------------------------------------------------------------------------------------------------------------------------------------------------|------|
| -mlrlod | --mlr-lod               | double      | LOD threshold above which the realigner will proceed to realign. This term is equivalent to significance - e.g. is the improvement significant enough to merit realignment? Note that this number should be adjusted based on your particular data set. For low coverage and /or when looking for indels with low allele frequency, this number should be smaller. | 5.0  |
| -mlrmc  | --mlr-max-cons          | integer     | maximum alternate consensususes to try (necessary to improve performance in deep coverage). If you need to find the optimal solution regardless of running time, use a higher number.                                                                                                                                                                              | 30   |
| -mlrmis | --mlr-max-interval-size | integer     | max size in base pairs of intervals that will be passed to the realigner. Because the realignment algorithm is N^2, allowing too large an interval might take too long to completely realign.                                                                                                                                                                      | 500  |
| -mlrmlr | --mlr-min-loc-reads     | integer     | minimum coverage at a locus for the entropy calculation to be enabled.                                                                                                                                                                                                                                                                                             | 4    |
| -mlrmmf | --mlr-mismatch-fract    | double      | fraction of total sum of base qualities at a position that need to mismatch for the position to be considered to have high entropy. Note that this fraction should be adjusted based on your particular data set. For deep coverage and/or when looking for indels with low allele frequency, this number should be smaller than the default value.                | 0.15 |
| -mlrmrc | --mlr-max-reads-cons    | integer > 0 | maximum number of reads (chosen randomly) used for finding the potential alternate consensususes (necessary to improve performance in deep coverage). If you need to find the optimal solution regardless of running time, use a higher number.                                                                                                                    | 120  |
| -mlrws  | --mlr-window-size       | integer > 0 | any two SNP calls and/or high entropy positions are considered clustered when they occur no more than N base pairs apart.                                                                                                                                                                                                                                          | 10   |

| Mark duplicates parameters |                 |             |                                                                                                                                                                                                                                                                                                                                                                                                          |                                                 |
|----------------------------|-----------------|-------------|----------------------------------------------------------------------------------------------------------------------------------------------------------------------------------------------------------------------------------------------------------------------------------------------------------------------------------------------------------------------------------------------------------|-------------------------------------------------|
| Short option               | Long option     | Type        | Description                                                                                                                                                                                                                                                                                                                                                                                              | Default value                                   |
| -mdd                       | --md-pixel-dist | integer > 0 | the maximum offset between two duplicate clusters in order to consider them optical duplicates. This should usually be set to some fairly small number (e.g. 5-10 pixels) unless using later versions of the Illumina pipeline that multiply pixel values by 10, in which case 50-100 is more normal.                                                                                                    | 100                                             |
| -mdr                       | --md-rn-regex   | text        | regular expression that can be used to parse read names in the incoming SAM file. Read names are parsed to extract three variables: tile/region, x coordinate and y coordinate. These values are used to estimate the rate of optical duplication in order to give a more accurate estimated library size. The regular expression should contain three capture groups for the three variables, in order. | [a-zA-Z0-9]+:[0-9]:([0-9]+):([0-9]+):([0-9]+).* |
| -mds                       | --md-max-seqs   | integer > 0 | the maximum number of sequences allowed in SAM file. If this value is exceeded, program won't spill to disk (used to avoid situation where there are not enough file handles).                                                                                                                                                                                                                           | 50000                                           |

**Supplementary Table 1: SIMPLEX parameter description**

|      |                  |         |                                                                                                                                                                                      |        |
|------|------------------|---------|--------------------------------------------------------------------------------------------------------------------------------------------------------------------------------------|--------|
| -nd  | --no-dup         | switch  | if given, duplicate removal is not preformed, available for SE mode only.                                                                                                            | -      |
| -pmr | --picard-max-ram | integer | this specifies the number of records stored in RAM before spilling to disk. Increasing this number reduces the number of file handles needed and increases the amount of RAM needed. | 500000 |

| Exon filter parameters |              |        |                                                               |               |
|------------------------|--------------|--------|---------------------------------------------------------------|---------------|
| Short option           | Long option  | Type   | Description                                                   | Default value |
| -sfecs                 | --sf-exon-cs | switch | if set - strand has to match (+/-) strand to pass the filter. | -             |
| -skip                  | --skip-trace | switch | skip writing intermediate failed sequence outputs.            | -             |

| Alignment summary parameters |                   |         |                                                                                                                                                                                      |               |
|------------------------------|-------------------|---------|--------------------------------------------------------------------------------------------------------------------------------------------------------------------------------------|---------------|
| Short option                 | Long option       | Type    | Description                                                                                                                                                                          | Default value |
| -casm                        | --casm-max-insert | integer | paired end reads above this insert size will be considered chimeric along with inter-chromosomal pairs.                                                                              | 100000        |
| -pmr                         | --picard-max-ram  | integer | this specifies the number of records stored in RAM before spilling to disk. Increasing this number reduces the number of file handles needed and increases the amount of RAM needed. | 500000        |

| DIP genotyping parameters |                        |                    |                                                                                                                                                                                                                           |               |
|---------------------------|------------------------|--------------------|---------------------------------------------------------------------------------------------------------------------------------------------------------------------------------------------------------------------------|---------------|
| Short option              | Long option            | Type               | Description                                                                                                                                                                                                               | Default value |
| -dipcmc                   | --dipc-min-cov         | integer > 0        | indel calls will be made only at sites with coverage of minCoverage or more reads.                                                                                                                                        | 6             |
| -dipcmcf                  | --dipc-min-cons-frac   | double $\in [0;1]$ | indel call is made only if fraction of consensus indel observations at a site with respect to all indel observations at the site exceeds this threshold.                                                                  | 0.7           |
| -dipcmf                   | --dipc-min-frac        | double $\in [0;1]$ | minimum fraction of reads with consensus indel at a site, out of all reads covering the site, required for making a call (fraction of non-consensus indels at the site is not considered here, see <i>-dipcmcf</i> ).     | 0.3           |
| -dipcmic                  | --dipc-min-indel-count | integer $\geq 0$   | minimum count of reads supporting consensus indel required for making the call. This filter supercedes <i>dipcmf</i> , i.e. indels with acceptable <i>dipcmf</i> at low coverage ( <i>dipcmic</i> not met) will not pass. | 0             |
| -dipcmr                   | --dipc-max-reads       | integer            | maximum number of reads to cache in the window; if number of reads exceeds this number, the window will be skipped and no calls will be made from it.                                                                     | -             |

**Supplementary Table 1: SIMPLEX parameter description**

|              |                         |                 |                                                                                                                                                                                                                                                                                                                                                                                                                                                                                                                                                                            |        |
|--------------|-------------------------|-----------------|----------------------------------------------------------------------------------------------------------------------------------------------------------------------------------------------------------------------------------------------------------------------------------------------------------------------------------------------------------------------------------------------------------------------------------------------------------------------------------------------------------------------------------------------------------------------------|--------|
| -dipcws      | --dipc-window-size      | integer > 0     | in order to be able to 1) count in all indel- and reference-supporting reads and to collect alignment statistics (mismatches, base quals etc) for each putative event 2) resolve nearby putative events (spanned by a read) and (re-)compute all stats for each of them, the genotyper caches the reads inside a sliding window. The window must be definitely larger than the longest span of a read on the reference (note: alignments with long deletions will have large span (read length + deletion length)), 2-3 times the read length is usually more than enough. | 200    |
| -dipcmcavmm  | --dipc-max-cons-av-mm   | double $\geq 0$ | max. average number of mismatches per (consensus) indel-containing read. If the number is greater than this threshold, indel will be discarded/marked.                                                                                                                                                                                                                                                                                                                                                                                                                     | 3.0    |
| -dipcmcavq   | --dipc-min-cons-av-qual | double $\geq 0$ | min. average base quality in all indel supporting reads in the nqs window around the indel. If the average base quality is less than this threshold, the indel will be discarded/ marked.                                                                                                                                                                                                                                                                                                                                                                                  | 0.0    |
| -dipcmcnqsmm | --dipc-max-cons-nqs-mm  | double $\geq 0$ | max. average mismatch rate in NQS window around the indel, across all indel-containing read. If the number is greater than this threshold, indel will be discarded/marked.                                                                                                                                                                                                                                                                                                                                                                                                 | 0.5    |
| -dipcmravmm  | --dipc-max-ref-av-mm    | double $\geq 0$ | max. average number of mismatches per reference-matching read. If the number is greater than this threshold, indel will be discarded/marked.                                                                                                                                                                                                                                                                                                                                                                                                                               | 100000 |
| -dipcmrnq    | --dipc-min-ref-nq       | double $\geq 0$ | min. average base quality in all reference supporting reads in the nqs window around the indel. If the average base quality is less than this threshold, the indel will be discarded/ marked                                                                                                                                                                                                                                                                                                                                                                               | 0.0    |
| -pmr         | --picard-max-ram        | integer         | this specifies the number of records stored in RAM before spilling to disk. Increasing this number reduces the number of file handles needed and increases the amount of RAM needed.                                                                                                                                                                                                                                                                                                                                                                                       | 500000 |

| SNP genotyping parameters |                      |                                           |                                                                                                                                                                                                                                                                    |               |
|---------------------------|----------------------|-------------------------------------------|--------------------------------------------------------------------------------------------------------------------------------------------------------------------------------------------------------------------------------------------------------------------|---------------|
| Short option              | Long option          | Type                                      | Description                                                                                                                                                                                                                                                        | Default value |
| -snpcab                   | --snpc-all-bases     | switch                                    | instructs the genotyper to emit calls at all bases with coverage, regardless of the confidence or genotype at the locus.                                                                                                                                           | -             |
| -snpcbm                   | --snpc-base-model    | ONE_STATE  <br>THREE_STATE  <br>EMPIRICAL | base substitution model to employ                                                                                                                                                                                                                                  | EMPIRICAL     |
| -snpcbq                   | --snpc-cap-base-qual | switch                                    | cap the base quality of any given base by its read's mapping quality.                                                                                                                                                                                              | -             |
| -snpcd                    | --snpc-del           | double                                    | maximum fraction of reads with deletions spanning this locus for it to be callable (to disable, set to < 0 or > 1).                                                                                                                                                | 0.05          |
| -snpcg                    | --snpc-genotype      | switch                                    | enables genotyping mode, whereby the confidence in the genotype itself is used for the confidence threshold test rather than the confidence in a non-reference genotype. Should the output be confident genotypes (i.e. including ref calls) or just the variants? | -             |

**Supplementary Table 1: SIMPLEX parameter description**

|           |                         |                               |                                                                                                                                                                             |                   |
|-----------|-------------------------|-------------------------------|-----------------------------------------------------------------------------------------------------------------------------------------------------------------------------|-------------------|
| -snpcgm   | -snpcgm                 | GM_JOINT_ESTIMATE   GM_DINDEL | genotype calculation model to employ.                                                                                                                                       | GM_JOINT_ESTIMATE |
| -snpch    | --snpc-het              | double                        | value used to compute prior likelihoods for any locus.                                                                                                                      | 0.001             |
| -snpcmbq  | --snpc-min-base-qual    | integer $\geq 0$              | minimum base quality required to consider a base for calling.                                                                                                               | 10                |
| -snpcmmiw | --snpc-max-mm-in-window | integer $\geq 0$              | maximum number of mismatches within a 40 bp window (20bp on either side) around the target position for a read to be used for calling.                                      | 3                 |
| -snpcmmq  | --snpc-min-mq           | integer $\geq 0$              | minimum read mapping quality required to consider a read for calling.                                                                                                       | 10                |
| -snpcmr   | --snpc-max-reads        | integer $\geq 0$              | specifies the maximum coverage at a locus. This is used to skip loci that have too much coverage.                                                                           | -                 |
| -snpcns   | --snpc-no-SLOD          | switch                        | instructs the genotyper not to calculate the SLOD.                                                                                                                          | -                 |
| -snpcsc   | --snpc-std-call-conf    | integer $\geq 0$              | the minimum phred-scaled confidence threshold at which variants not at 'trigger' track sites should be called.                                                              | 30                |
| -snpcsec  | --snpc-std-emit-conf    | integer $\geq 0$              | the minimum phred-scaled confidence threshold at which variants not at 'trigger' track sites should be emitted (and marked as filtered if less than the calling threshold). | 10                |
| -snpctcc  | --snpc-trig-call-conf   | integer $\geq 0$              | the minimum phred-scaled confidence threshold at which variants at 'trigger' track sites should be called.                                                                  | 30                |
| -snpctec  | --snpc-trig-emit-conf   | integer $\geq 0$              | the minimum phred-scaled confidence threshold at which variants at 'trigger' track sites should be emitted (and marked as filtered if less than the calling threshold).     | 10                |
| -snpfc    | --snpf-cluster          | integer $\geq 0$              | number of SNPs which make up a cluster                                                                                                                                      | 3                 |
| -snpfcs   | --snpf-cluster-size     | integer $\geq 0$              | window size (in bases) in which to evaluate clustered SNPs (to disable the clustered SNP filter, set this value to less than 1)                                             | 0                 |
| -snpfmw   | --snpf-mask-window      | integer $\geq 0$              | number of bases to extend an indel interval on both sides                                                                                                                   | 10                |

| variant quality score recalibration parameters |               |                         |                                                                                                                                                                                           |               |
|------------------------------------------------|---------------|-------------------------|-------------------------------------------------------------------------------------------------------------------------------------------------------------------------------------------|---------------|
| Short option                                   | Long option   | Type                    | Description                                                                                                                                                                               | Default value |
| -rvqavcfd                                      | --rvq-avc-fdr | double                  | ApplyVariantCuts - fdr_filter_level: The FDR level at which to start filtering.                                                                                                           | 10            |
| -rvq                                           | --rvq-vr-bO   | double                  | VariantRecalibrator - backOff: The Gaussian back off factor, used to prevent overfitting by enlarging out the Gaussians.                                                                  | 1.3           |
| -rvqd                                          | --rvq-gvc-d   | double                  | GenerateVariantClusters - dirichlet: the dirichlet parameter in variational Bayes algoirhtm.                                                                                              | 1000.0        |
| -rvqD                                          | --rvq-gvc-wD  | double                  | GenerateVariantClusters - weightDBSNP: the weight for dbSNP variants during clustering.                                                                                                   | 0.0           |
| -rvqdV                                         | --rvq-vr-dv   | integer                 | VariantRecalibrator - dV: The desired number of variants to keep in a theoretically filtered set.                                                                                         | 0             |
| -rvqfdr                                        | --rvq-vr-fdr  | comma separated doubles | VariantRecalibrator - FDRtranche: comma separed list of levels of novel false discovery rate (FDR, implied by ti/tv) at which to slice the data. (in percent, that is 1.0 for 1 percent). | -             |

**Supplementary Table 1: SIMPLEX parameter description**

|         |                 |         |                                                                                                                                                                                                                             |        |
|---------|-----------------|---------|-----------------------------------------------------------------------------------------------------------------------------------------------------------------------------------------------------------------------------|--------|
| -rvqfl  | --rvq-gvc-fl    | switch  | GenerateVariantClusters - forceIndependent: force off-diagonal entries in the covariance matrix to be zero.                                                                                                                 | -      |
| -rvqg   | --rvq-gvc-mG    | integer | GenerateVariantClusters - mG: the maximum number of Gaussians to try during Bayesian clustering                                                                                                                             | 4      |
| -rvqH   | --rvq-gvc-wH    | double  | GenerateVariantClusters - weightHapMap: the weight for HapMap variants during clustering.                                                                                                                                   | 1.0    |
| -rvqi   | --rvq-gvc-ml    | integer | GenerateVariantClusters - ml: the maximum number of iterations to be performed when clustering. Clustering will normally end when convergence is detected.                                                                  | 200    |
| -rvqk   | --rvq-gvc-u1kg  | switch  | GenerateVariantClusters: use 1000 genomes project data to generate variant clusters.                                                                                                                                        | -      |
| -rvqK   | --rvq-gvc-wK    | double  | GenerateVariantClusters - weight1KG: The weight for 1000 Genomes Project variants during clustering.                                                                                                                        | 1.0    |
| -rvqn   | --rvq-gvc-wN    | double  | GenerateVariantClusters - weightNovel: the weight for novel variants during clustering.                                                                                                                                     | 0.0    |
| -rvqpD  | --rvq-vr-pD     | double  | VariantRecalibrator - priorDBSNP: A prior on the quality of dbSNP variants, a phred scaled probability of being true.                                                                                                       | 10.0   |
| -rvqpH  | --rvq-vr-pH     | double  | VariantRecalibrator - priorHapMap: A prior on the quality of HapMap variants, a phred scaled probability of being true.                                                                                                     | 15.0   |
| -rvqpK  | --rvq-vr-pK     | double  | Genomes Project variants, a phred scaled probability of being true. Currently not supported since 1000 Genomes Project data is not on cluster yet.                                                                          | 12.0   |
| -rvqpN  | --rvq-vr-pN     | double  | VariantRecalibrator - priorNovel: A prior on the quality of novel variants, a phred scaled probability of being true.                                                                                                       | 2.0    |
| -rvqQ   | --rvq-gvc-q     | integer | GenerateVariantClusters - qual: if a known variant has raw QUAL value less than -qual then don't use it for clustering                                                                                                      | -      |
| -rvqQ   | --rvq-vr-qstep  | double  | VariantRecalibrator - qStep: Resolution in QUAL units for optimization and tranche calculations.                                                                                                                            | 0.1    |
| -rvqs   | --rvq-gvc-s     | double  | GenerateVariantClusters - shrinkage: the shrinkage parameter in variational Bayes algorithm.                                                                                                                                | 0.0001 |
| -rvqS   | --rvq-vr-qscale | double  | VariantRecalibrator - qScale: Multiply all final quality scores by this value. Needed to normalize the quality scores.                                                                                                      | 100.0  |
| -rvqsfp | --rvq-vr-sfp    | double  | VariantRecalibrator - singleton_fp_rate: Prior expectation that a singleton call would be a FP.                                                                                                                             | 0.5    |
| -rvqt   | --rvq-gvc-std   | double  | GenerateVariantClusters - std: if a variant has annotations more than -std standard deviations away from mean then don't use it for clustering.                                                                             | 4.5    |
| -rvqT   | --rvq-vr-titv   | double  | VariantRecalibrator - titv: The expected novel Ti/Tv ratio to use when calculating FDR tranches and for display on optimization curve output figures. (~2.07 for whole genome experiments; 3.0 for whole exome experiments) | 3.0    |



**Supplementary Table 1: SIMPLEX parameter description**

|  |
|--|
|  |
|--|

## Supplementary Table 1: SIMPLEX parameter description

## Supplementary Table 1: SIMPLEX parameter description
