# Supplementary material for: SIMPLEX: Cloud-Enabled Pipeline for the Comprehensive Analysis of Exome Sequencing Data
Source: PLOS journal article supplement (doi:10.1371/journal.pone.0041948), 2012-08-01
Supplement: S3 (10.1371/journal.pone.0041948.s003) [file journal.pone.0041948.s003]

**Supplementary Table 3: Comparison Simplex-Atlas2-Treat**

|                     | <b>SIMPLEX</b> | <b>Atlas2 (filtered)</b> | <b>Intersection Simplex-Atlas2</b> | <b>Treat</b> |
|---------------------|----------------|--------------------------|------------------------------------|--------------|
| SNP – SE            | 2,588          | 7,025                    | 1,480                              | - *          |
| SNP – PE            | 3,539          | 6,779                    | 1,516                              | 56,073 **    |
| DIP – SE            | 173            | 18,735                   | 145                                | - *          |
| DIP – PE            | 370            | 55,390                   | 333                                | 3,534 **     |
| <b>Runtime(min)</b> |                |                          |                                    |              |
| SNP – SE            | 5              | 37                       | -                                  | - ***        |
| SNP – PE            | 6              | 56                       | -                                  | - ***        |
| DIP – SE            | 3              | 28                       | -                                  | - ***        |
| DIP – PE            | 5              | 44                       | -                                  | - ***        |

\* SE data was not tested as TREAT threw an error.

\*\* Treat vcf results are called “\*raw.vcf” and do not contain any values in the filter column.  
Therefore, we suggest that the resulting files represent raw SNPs.

\*\*\* Runtime for Treat could not be established since the pipeline resulted in an error.
