# Supplementary material for: SIMPLEX: Cloud-Enabled Pipeline for the Comprehensive Analysis of Exome Sequencing Data
Source: PLOS journal article supplement (doi:10.1371/journal.pone.0041948), 2012-08-01
Supplement: S8 (10.1371/journal.pone.0041948.s008) [file journal.pone.0041948.s008]

# Statistics on FASTQ Files for NGS Data

ICBI - Section for Bioinformatics

May 11, 2012

This document provides information about quality values and their occurrence based on the sequence file *SRR063831.fastq*.

## 1 Sequenced Read Lengths

Displaying basic read length information from file *SRR063831\_readlengths.txt*.

- number of reads analyzed

```
> read_length
```

```
[1] 22.634.594
```

- statistics

```
> summary(read_lens)
```

| Min.  | 1st Qu. | Median | Mean  | 3rd Qu. | Max.  |
|-------|---------|--------|-------|---------|-------|
| 25.00 | 76.00   | 76.00  | 75.97 | 76.00   | 76.00 |

- histogram

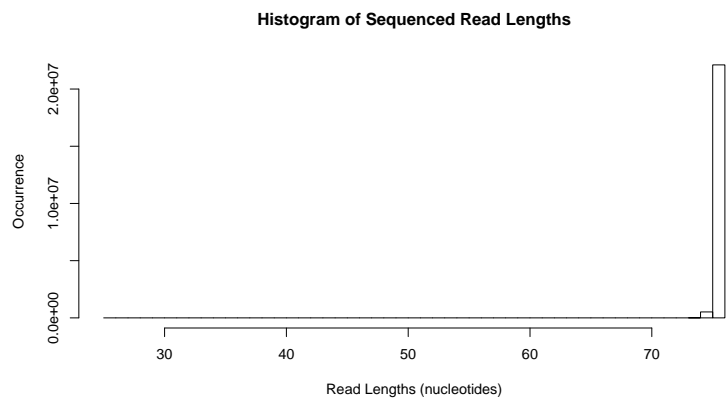

Supplementary Figure 1: Histogram of sequenced read lengths.

- boxplot

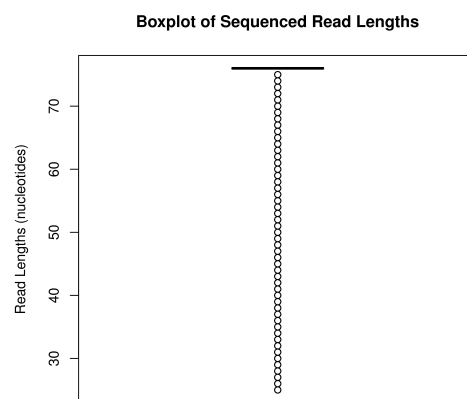

Supplementary Figure 2: Boxplot of sequenced read lengths.

---

## 2 Base Call Comparison

### 2.1 Comparison of Base Calls according to their Read Position

- quality value medians

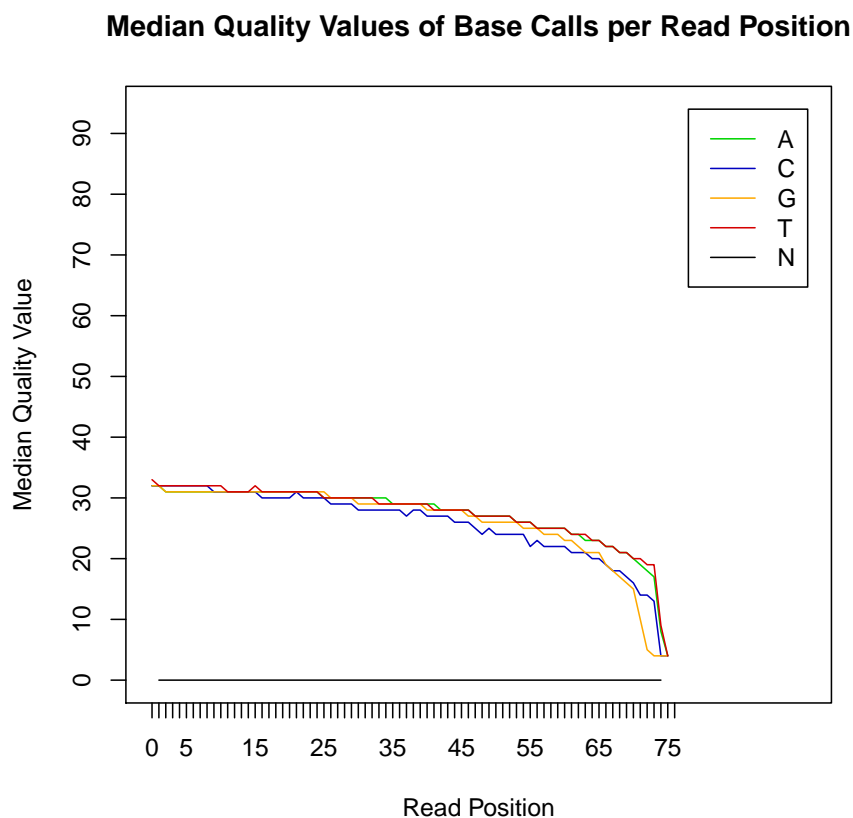

Supplementary Figure 3: Median quality values of each base per read position. Missing points in the graphs may occur due to no detection of the base at this certain position.

- absolute quality value frequencies

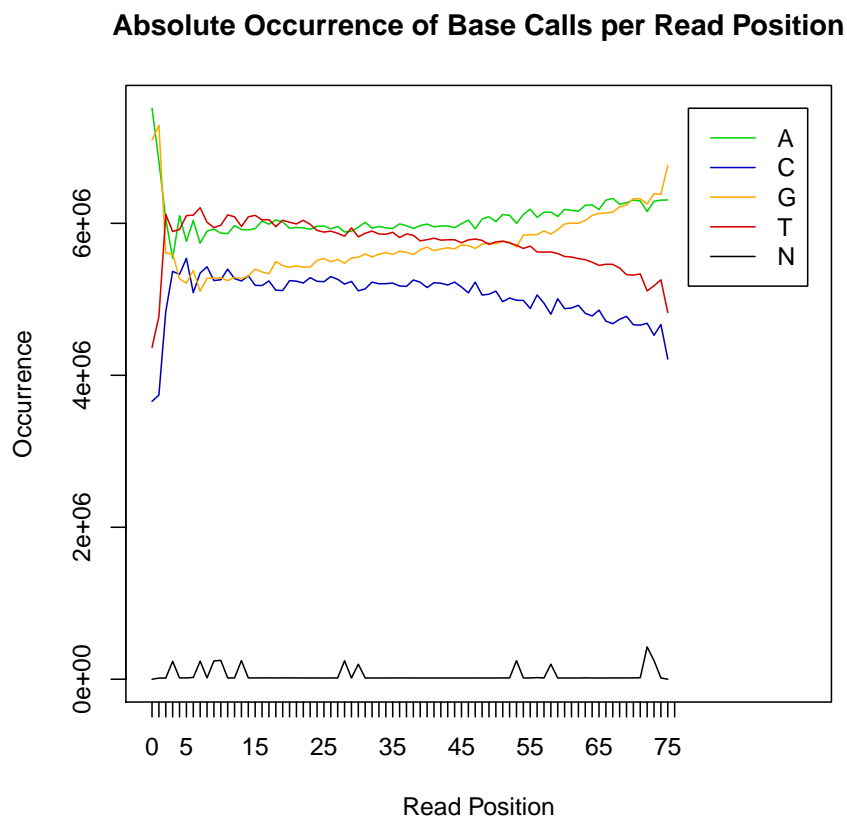

Supplementary Figure 4: Absolute occurrence of base calls per read position.

- contents in %  

```
> GC_content
[1] 47.62411
> AT_content
[1] 52.15411
> N_content
[1] 0.2217846
```

---

## 2.2 Distribution of Occurrences of IUPAC Code N (Gaps) per Read

- number of reads containing no gaps

```
> no_n_per_read
```

```
[1] 20.222.826
```

- number of reads consisting only of gaps

```
> all_n_per_read
```

```
[1] 0
```

- number of reads containing at least one gap and at least one nucleotide

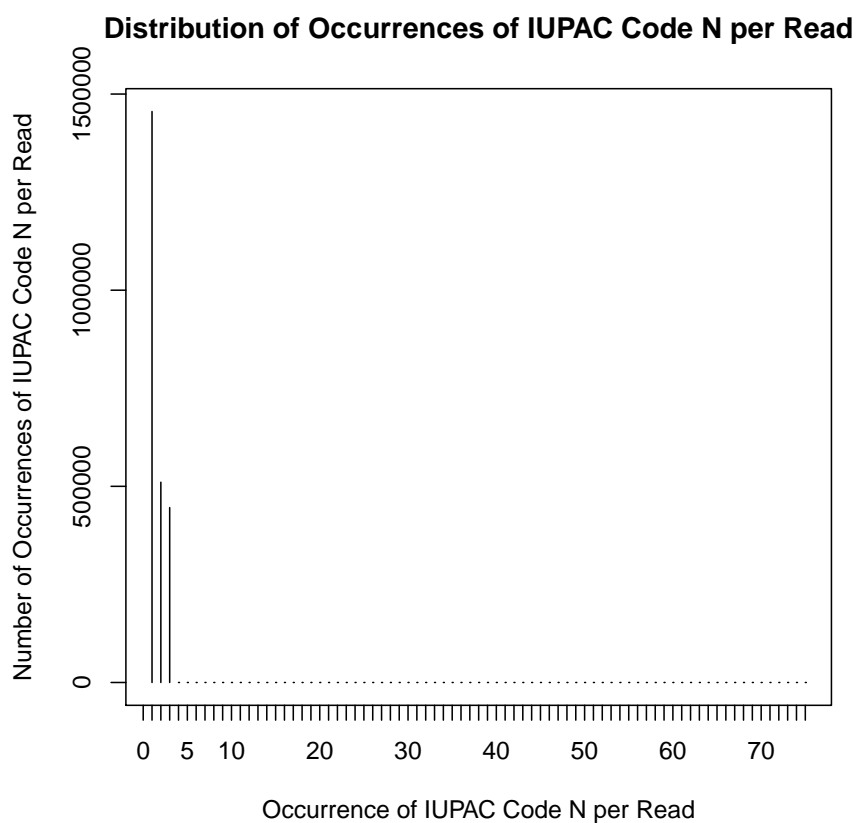

Supplementary Figure 5: Number of reads with at least one gap and one nucleotide

---

### 3 Quality Values for IUPAC Nucleotide Code A

Showing information about quality values for Adenine obtained from file *SRR063831-A\_qualities.txt*

- normalized heatmap of quality value distribution per read position. Normalization is done by division by the value's colsum.

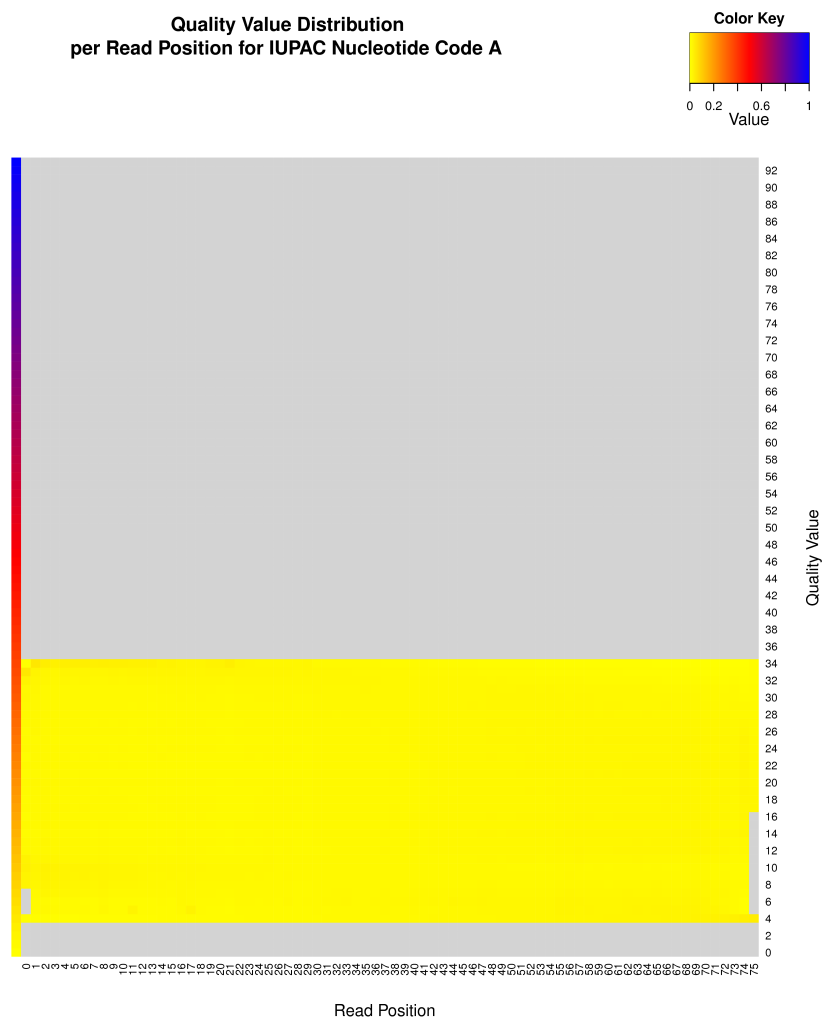

Supplementary Figure 6: Heatmap showing the quality value distribution per read position for Adenine. The color key on the upper right side and on the vertical left stripe encode the values  $\in [0; 1]$ . Lightgrey areas mark quality values that did not occur. For displaying reasons only every other quality value is labeled.

---

## 4 Quality Values for IUPAC Nucleotide Code C

Showing information about quality values for Cytosine obtained from file *SRR063831-C\_qualities.txt*

- normalized heatmap of quality value distribution per read position. Normalization is done by division by the value's colsum.



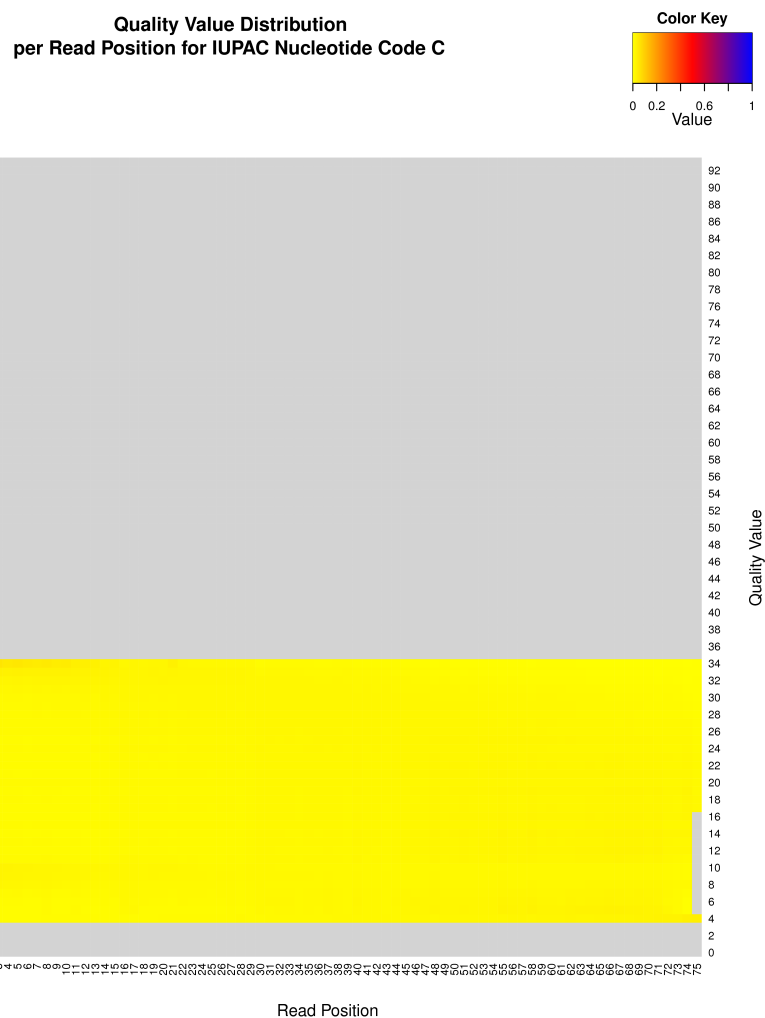

Supplementary Figure 7: Heatmap showing the quality value distribution per read position for Cytosine. The color key on the upper right side and on the vertical left stripe encode the values  $\in [0; 1]$ . Lightgrey areas mark quality values that did not occur. For displaying reasons only every other quality value is labeled.

---

## 5 Quality Values for IUPAC Nucleotide Code G

Showing information about quality values for Guanine obtained from file *SRR063831-G\_qualities.txt*

- normalized heatmap of quality value distribution per read position. Normalization is done by division by the value's colsum.

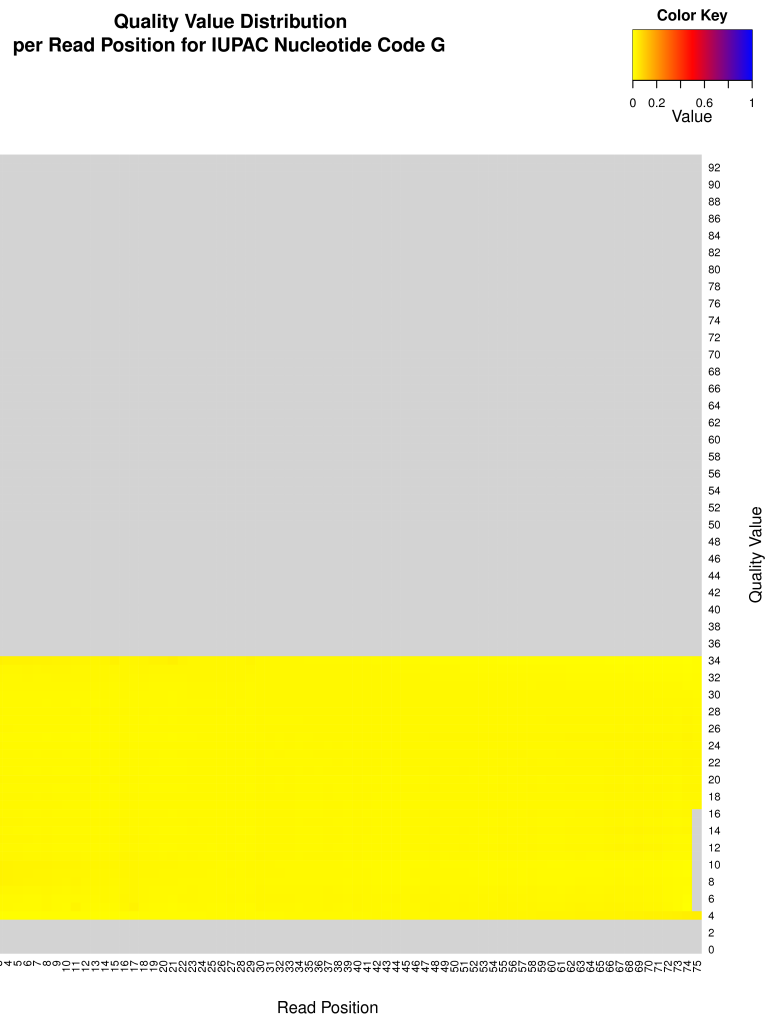

Supplementary Figure 8: Heatmap showing the quality value distribution per read position for Guanine. The color key on the upper right side and on the vertical left stripe encode the values  $\in [0; 1]$ . Lightgrey areas mark quality values that did not occur. For displaying reasons only every other quality value is labeled.

---

## 6 Quality Values for IUPAC Nucleotide Code T

Showing information about quality values for Thymine obtained from file *SRR063831-T\_qualities.txt*

- normalized heatmap of quality value distribution per read position. Normalization is done by division by the value's colsum.

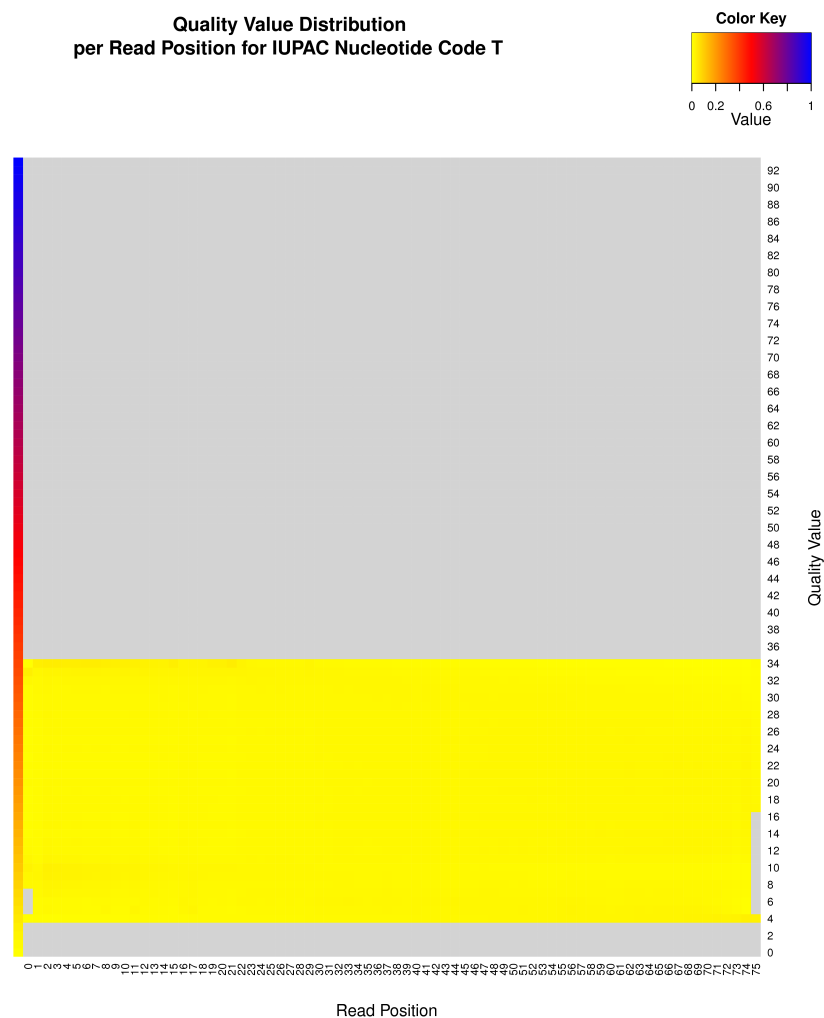

Supplementary Figure 9: Heatmap showing the quality value distribution per read position for Thymine. The color key on the upper right side and on the vertical left stripe encode the values  $\in [0; 1]$ . Lightgrey areas mark quality values that did not occur. For displaying reasons only every other quality value is labeled.

---

## 7 Quality Values for IUPAC Nucleotide Code N

Showing information about quality values for not identified bases obtained from file *SRR063831\_N\_qualities.txt*

- normalized heatmap of quality value distribution per read position. Normalization is done by division by the value's colsum.

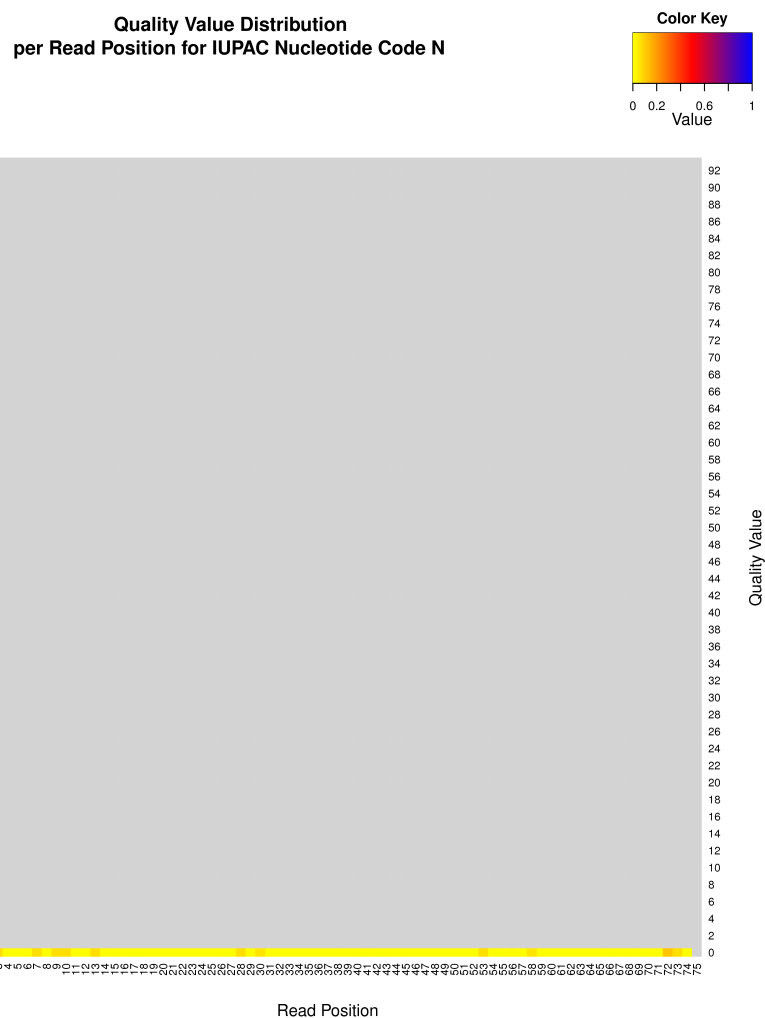

Supplementary Figure 10: Heatmap showing the quality value distribution per read position for not identified bases. The color key on the upper right side and on the vertical left stripe encode the values  $\in ]0; 1]$ . Lightgrey areas mark quality values that did not occur. For displaying reasons only every other quality value is labeled.
