# Supplementary material for: SIMPLEX: Cloud-Enabled Pipeline for the Comprehensive Analysis of Exome Sequencing Data
Source: PLoS One. 2012 Aug 1;7(8):e41948. doi: 10.1371/journal.pone.0041948 (PMC3411592; doi:10.1371/journal.pone.0041948)
Supplement: Table S2 — Kabuki syndrome study summary. (XLS) [file pone.0041948.s002.xls]

## Sheet: SE
Supplementary Table 2: Kabuki study summary (SE reads)
		Mean	SRR063756	SRR063757	SRR063758	SRR063759		SRR063823	SRR063827	SRR063831	SRR063836	SRR063842		SRR063822	SRR063825	SRR063829	SRR063837		SRR063821	SRR063828	SRR063835	SRR063838	SRR063841		SRR063834	SRR063839		SRR063826	SRR063833		SRR063824	SRR063830		SRR063832	SRR063840		SRR063819	SRR063820		SRR063943	SRR063944
Statistics	Genome Size	3101804741	3101804741	3101804741	3101804741	3101804741		3101804741	3101804741	3101804741	3101804741	3101804741		3101804741	3101804741	3101804741	3101804741		3101804741	3101804741	3101804741	3101804741	3101804741		3101804741	3101804741		3101804741	3101804741		3101804741	3101804741		3101804741	3101804741		3101804741	3101804741		3101804741	3101804741
	Exome Size	30711874	30711874	30711874	30711874	30711874		30711874	30711874	30711874	30711874	30711874		30711874	30711874	30711874	30711874		30711874	30711874	30711874	30711874	30711874		30711874	30711874		30711874	30711874		30711874	30711874		30711874	30711874		30711874	30711874		30711874	30711874
	No. Input Reads	2.2638e+07	11841367	10698498	19988388	21949039		29740577	30665091	28013251	29256130	23522176		20135780	19307425	22943258	18795609		27056419	27121148	25086955	24679049	28105573		18858491	20443349		19310350	23318700		24402122	20450893		24364195	19976652		24844946	20163067		19625440	24476101
	Genome Fold Coverage	0.554673	0.290136	0.262133	0.489753	0.537792		0.7287	0.751352	0.686377	0.71683	0.576337		0.493364	0.473068	0.562153	0.460527		0.662933	0.664519	0.614677	0.604683	0.688639		0.462068	0.5009		0.47314	0.571352		0.597897	0.501085		0.596968	0.489465		0.608748	0.494033		0.48086	0.59971
	Exome Fold Coverage	13.2057	8.61554	8.23982	14.5335	16.5088		19.6455	19.5036	14.348	19.4937	17.0308		14.7339	14.3535	17.3341	14.0206		13.6114	17.7238	16.8899	12.4957	17.5604		6.62164	7.12421		9.67044	11.6992		10.6439	8.98814		10.8521	9.23688		11.4511	9.72773		10.7308	12.7834
	Exome Capture Specificity	0.37706	0.4413	0.4423	0.4214	0.4173		0.4017	0.4008	0.4278	0.4022	0.4176		0.4045	0.4071	0.393	0.4101		0.3486	0.3366	0.3397	0.3607	0.3361		0.3267	0.3267		0.3641	0.3588		0.3199	0.3262		0.3275	0.3342		0.3664	0.3742		0.3926	0.3857
	Low Covered Exons (<=6)	0.331573	0.4156	0.4243	0.2627	0.2346		0.2148	0.2206	0.2768	0.2162	0.2213		0.289	0.2919	0.2579	0.2972		0.2923	0.2271	0.229	0.308	0.2352		0.6399	0.6218		0.3825	0.334		0.3746	0.4169		0.3656	0.4083		0.3788	0.4255		0.3635	0.3213
	Low covered exons (<1x coverage)	0.187906	0.213647	0.213128	0.149852	0.139331		0.135539	0.138559	0.16061	0.135982	0.132579		0.166572	0.166189	0.155608	0.168723		0.164831	0.137353	0.137049	0.166906	0.141958		0.40731	0.387831		0.199613	0.180695		0.216013	0.23367		0.195813	0.214275		0.19187	0.215642		0.192861	0.177183
	Well covered exons (>=20x coverage)	0.0696294	0.0109474	0.0102811	0.0544418	0.0921209		0.215498	0.215241	0.068999	0.211319	0.124617		0.0709936	0.0630024	0.128421	0.0568118		0.0433974	0.127021	0.0993573	0.0276089	0.128522		0.0193055	0.0248383		0.0182471	0.0367978		0.0288866	0.0156747		0.0292662	0.016303		0.0448481	0.0229027		0.0284944	0.0547159
Trimming	Trimmed		0	0	0	0		163703	163056	1733735	173817	168216		0	0	0	0		832834	172569	162104	1462085	694352		0	0		0	0		0	0		0	0		0	0		0	0
	Not Trimmed	2.24471e+07	11841367	10698498	19988388	21949039		29576874	30502035	26279516	29082313	23353960		20135780	19307425	22943258	18795609		26223585	26948579	24924851	23216964	27411221		18858491	20443349		19310350	23318700		24402122	20450893		24364195	19976652		24844946	20163067		19625440	24476101
Min Length Filter	Pairs Passed	2.26227e+07	11841367	10698498	19988388	21949039		29712671	30632214	27932209	29225876	23493244		20135780	19307425	22943258	18795609		27012608	27083520	25045804	24598559	28049263		18858491	20443349		19310350	23318700		24402122	20450893		24364195	19976652		24844946	20163067		19625440	24476101
	Pairs Passed [% RR]	0.999433	1	1	1	1		0.9991	0.9989	0.9971	0.999	0.9988		1	1	1	1		0.9984	0.9986	0.9984	0.9967	0.998		1	1		1	1		1	1		1	1		1	1		1	1
	Pairs Failed	15346.7	0	0	0	0		27906	32877	81042	30254	28932		0	0	0	0		43811	37628	41151	80490	56310		0	0		0	0		0	0		0	0		0	0		0	0
	Pairs Failed [% RR]	0.000566667	0	0	0	0		0.0009	0.0011	0.0029	0.001	0.0012		0	0	0	0		0.0016	0.0014	0.0016	0.0033	0.002		0	0		0	0		0	0		0	0		0	0		0	0
N Max Filter	Pairs Passed	2.21627e+07	11841367	10698498	19988388	21949039		29439857	30352147	22634594	28956926	23233715		20135780	19307425	22943258	18795609		23584952	26814872	24784432	21479324	27707271		18858491	20443349		19310350	23318700		24402122	20450893		24364195	19976652		24844946	20163067		19625440	24476101
	Pairs Passed [% RR]	0.98232	1	1	1	1		0.9899	0.9898	0.808	0.9898	0.9877		1	1	1	1		0.8717	0.9887	0.9879	0.8703	0.9858		1	1		1	1		1	1		1	1		1	1		1	1
	Pairs Failed	459929	0	0	0	0		272814	280067	5297615	268950	259529		0	0	0	0		3427656	268648	261372	3119235	341992		0	0		0	0		0	0		0	0		0	0		0	0
	Pairs Failed [% RR]	0.0171067	0	0	0	0		0.0092	0.0091	0.1891	0.0092	0.011		0	0	0	0		0.1267	0.0099	0.0104	0.1264	0.0122		0	0		0	0		0	0		0	0		0	0		0	0
Quality Filter	Pairs Passed	2.21627e+07	11841367	10698498	19988388	21949039		29439857	30352147	22634594	28956926	23233715		20135780	19307425	22943258	18795609		23584952	26814872	24784432	21479324	27707271		18858491	20443349		19310350	23318700		24402122	20450893		24364195	19976652		24844946	20163067		19625440	24476101
	Pairs Passed [% RR]	0.98232	1	1	1	1		0.9899	0.9898	0.808	0.9898	0.9877		1	1	1	1		0.8717	0.9887	0.9879	0.8703	0.9858		1	1		1	1		1	1		1	1		1	1		1	1
	Pairs Failed	0	0	0	0	0		0	0	0	0	0		0	0	0	0		0	0	0	0	0		0	0		0	0		0	0		0	0		0	0		0	0
	Pairs Failed [% RR]	0	0	0	0	0		0	0	0	0	0		0	0	0	0		0	0	0	0	0		0	0		0	0		0	0		0	0		0	0		0	0
Preproc. reads			11841367	10698498	19988388	21949039		29439857	30352147	22634594	28956926	23233715		20135780	19307425	22943258	18795609		23584952	26814872	24784432	21479324	27707271		18858491	20443349		19310350	23318700		24402122	20450893		24364195	19976652		24844946	20163067		19625440	24476101
Mapping Filter	Reads Passed	1.41639e+07	7890183	7527835	13938378	15987720		19763903	19669689	13555441	19589706	16482405		14719296	14248659	17825165	13816130		15781016	21278380	20093344	13999941	21120042		8191535	8811672		10731778	13177834		13445530	11136306		13391095	11169027		12630324	10505736		11046410	13392960
	Reads Passed [% RR]	0.625143	0.6663	0.7036	0.6973	0.7284		0.6645	0.6414	0.4839	0.6696	0.7007		0.731	0.738	0.7769	0.7351		0.5833	0.7846	0.8009	0.5673	0.7515		0.4344	0.431		0.5558	0.5651		0.551	0.5445		0.5496	0.5591		0.5084	0.521		0.5629	0.5472
	Reads Passed [% FR]	0.636603	0.6663	0.7036	0.6973	0.7284		0.6713	0.648	0.5989	0.6765	0.7094		0.731	0.738	0.7769	0.7351		0.6691	0.7935	0.8107	0.6518	0.7623		0.4344	0.431		0.5558	0.5651		0.551	0.5445		0.5496	0.5591		0.5084	0.521		0.5629	0.5472
	Reads Failed	7.99881e+06	3951184	3170663	6050010	5961319		9675954	10682458	9079153	9367220	6751310		5416484	5058766	5118093	4979479		7803936	5536492	4691088	7479383	6587229		10666956	11631677		8578572	10140866		10956592	9314587		10973100	8807625		12214622	9657331		8579030	11083141
	Reads Failed [% RR]	0.35718	0.3337	0.2964	0.3027	0.2716		0.3253	0.3484	0.3241	0.3202	0.287		0.269	0.262	0.2231	0.2649		0.2884	0.2041	0.187	0.3031	0.2344		0.5656	0.569		0.4442	0.4349		0.449	0.4555		0.4504	0.4409		0.4916	0.479		0.4371	0.4528
	Reads Failed [% FR]	0.363397	0.3337	0.2964	0.3027	0.2716		0.3287	0.352	0.4011	0.3235	0.2906		0.269	0.262	0.2231	0.2649		0.3309	0.2065	0.1893	0.3482	0.2377		0.5656	0.569		0.4442	0.4349		0.449	0.4555		0.4504	0.4409		0.4916	0.479		0.4371	0.4528
Duplicate Filter	Reads Passed	1.25351e+07	7354591	7030025	12457327	14100472		16975986	16865796	12080016	16853899	14565266		12327640	11990125	14606274	11695744		14292295	18756976	17824590	12769014	18621838		7188136	7738402		9995125	12134887		12350395	10349038		11997223	10121233		11551282	9716112		9901104	11842533
	Reads Passed [% RR]	0.554583	0.6211	0.6571	0.6232	0.6424		0.5708	0.55	0.4312	0.5761	0.6192		0.6122	0.621	0.6366	0.6223		0.5282	0.6916	0.7105	0.5174	0.6626		0.3812	0.3785		0.5176	0.5204		0.5061	0.506		0.4924	0.5067		0.4649	0.4819		0.5045	0.4838
	Reads Passed [% FR]	0.56487	0.6211	0.6571	0.6232	0.6424		0.5766	0.5557	0.5337	0.582	0.6269		0.6122	0.621	0.6366	0.6223		0.606	0.6995	0.7192	0.5945	0.6721		0.3812	0.3785		0.5176	0.5204		0.5061	0.506		0.4924	0.5067		0.4649	0.4819		0.5045	0.4838
	Reads Failed	1.6288e+06	535592	497810	1481051	1887248		2787917	2803893	1475425	2735807	1917139		2391656	2258534	3218891	2120386		1488721	2521404	2268754	1230927	2498204		1003399	1073270		736653	1042947		1095135	787268		1393872	1047794		1079042	789624		1145306	1550427
	Reads Failed [% RR]	0.0705533	0.0452	0.0465	0.0741	0.086		0.0937	0.0914	0.0527	0.0935	0.0815		0.1188	0.117	0.1403	0.1128		0.055	0.093	0.0904	0.0499	0.0889		0.0532	0.0525		0.0381	0.0447		0.0449	0.0385		0.0572	0.0525		0.0434	0.0392		0.0584	0.0633
	Reads Failed [% FR]	0.0717333	0.0452	0.0465	0.0741	0.086		0.0947	0.0924	0.0652	0.0945	0.0825		0.1188	0.117	0.1403	0.1128		0.0631	0.094	0.0915	0.0573	0.0902		0.0532	0.0525		0.0381	0.0447		0.0449	0.0385		0.0572	0.0525		0.0434	0.0392		0.0584	0.0633
Est. PCR dups. by chance		0.282953	0.0743	0.0607	0.2118	0.2554		0.4689	0.4985	0.416	0.4537	0.2933		0.2149	0.1976	0.279	0.1873		0.3881	0.3899	0.3336	0.3229	0.4187		0.1885	0.2215		0.1977	0.2882		0.3157	0.2217		0.3147	0.2115		0.3272	0.2155		0.2042	0.3176
Exome Filter	Reads Passed	5.33684e+06	3481570	3329739	5873056	6671250		7939993	7882734	5799143	7878545	6883115		5954026	5800317	7004773	5665764		5501066	7163295	6826236	5050178	7097955		2675827	2878917		3907859	4727674		4301251	3632141		4385389	3732658		4627435	3931012		4336339	5165834
	Reads Passed [% RR]	0.237243	0.294	0.3112	0.2938	0.3039		0.267	0.2571	0.207	0.2693	0.2926		0.2957	0.3004	0.3053	0.3014		0.2033	0.2641	0.2721	0.2046	0.2525		0.1419	0.1408		0.2024	0.2027		0.1763	0.1776		0.18	0.1869		0.1863	0.195		0.221	0.2111
	Reads Passed [% FR]	0.241623	0.294	0.3112	0.2938	0.3039		0.2697	0.2597	0.2562	0.2721	0.2963		0.2957	0.3004	0.3053	0.3014		0.2332	0.2671	0.2754	0.2351	0.2562		0.1419	0.1408		0.2024	0.2027		0.1763	0.1776		0.18	0.1869		0.1863	0.195		0.221	0.2111
	Reads Failed	7.19828e+06	3873021	3700286	6584271	7429222		9035993	8983062	6280873	8975354	7682151		6373614	6189808	7601501	6029980		8791229	11593681	10998354	7718836	11523883		4512309	4859485		6087266	7407213		8049144	6716897		7611834	6388575		6923847	5785100		5564765	6676699
	Reads Failed [% RR]	0.317343	0.3271	0.3459	0.3294	0.3385		0.3038	0.2929	0.2242	0.3068	0.3266		0.3165	0.3206	0.3313	0.3208		0.3249	0.4275	0.4384	0.3128	0.41		0.2393	0.2377		0.3152	0.3177		0.3299	0.3284		0.3124	0.3198		0.2787	0.2869		0.2835	0.2728
	Reads Failed [% FR]	0.323253	0.3271	0.3459	0.3294	0.3385		0.3069	0.296	0.2775	0.31	0.3306		0.3165	0.3206	0.3313	0.3208		0.3727	0.4324	0.4438	0.3594	0.4159		0.2393	0.2377		0.3152	0.3177		0.3299	0.3284		0.3124	0.3198		0.2787	0.2869		0.2835	0.2728
DIP calling	sum	473	238	197	573	608		892	871	521	875	749		586	582	818	564		533	796	736	385	791		173	161		242	281		252	235		242	210		291	223		249	316
	deletions	270.4	125	109	323	326		503	511	298	502	429		315	328	447	297		299	441	420	214	445		104	97		166	177		159	145		154	128		184	149		141	176
	insertions	202.6	113	88	250	282		389	360	223	373	320		271	254	371	267		234	355	316	171	346		69	64		76	104		93	90		88	82		107	74		108	140
	Ass. in Refseq	471.233	237	197	571	605		890	866	518	868	745		586	581	817	563		532	791	734	384	788		173	161		242	280		250	234		239	208		291	221		249	316
	In coding reg.	102.833	82	83	120	107		115	117	90	106	105		97	99	113	106		89	113	105	86	107		78	71		135	109		110	132		100	99		117	94		98	102
	In genomic reg.	1.76667	1	0	2	3		2	5	3	7	4		0	1	1	1		1	5	2	1	3		0	0		0	1		2	1		3	2		0	2		0	0
	In intron reg.	345.5	147	103	426	471		725	703	402	709	596		457	461	666	424		425	640	595	284	647		86	82		92	161		126	87		128	103		161	121		141	196
	Unknown	2.13333	0	1	1	1		10	7	1	8	8		2	3	2	4		1	2	4	0	4		0	1		1	0		0	1		1	0		0	0		0	1
	In UTR reg.	20.7667	8	10	24	26		40	39	25	45	36		30	18	36	29		17	36	30	14	30		9	7		14	10		14	14		10	6		13	6		10	17
	Del/Ins	1.41767	1.11	1.24	1.29	1.16		1.29	1.42	1.34	1.35	1.34		1.16	1.29	1.2	1.11		1.28	1.24	1.33	1.25	1.29		1.51	1.52		2.18	1.7		1.71	1.61		1.75	1.56		1.72	2.01		1.31	1.26
	chr1		24	12	53	49		71	74	47	81	66		57	69	85	69		59	81	79	46	96		17	11		20	27		25	16		23	19		30	20		33	35
	deletions		14	8	29	26		39	52	27	49	41		32	43	52	39		39	48	54	33	60		11	8		13	20		20	10		17	12		20	15		21	21
	insertions		10	4	24	23		32	22	20	32	25		25	26	33	30		20	33	25	13	36		6	3		7	7		5	6		6	7		10	5		12	14
	chr2		17	12	47	55		83	78	53	91	73		48	49	74	44		40	65	62	35	58		11	9		13	23		23	30		11	16		19	16		15	29
	deletions		11	7	32	33		44	39	27	45	42		26	26	39	20		18	28	32	17	26		6	7		6	10		12	18		6	10		9	10		9	16
	insertions		6	5	15	22		39	39	26	46	31		22	23	35	24		22	37	30	18	32		5	2		7	13		11	12		5	6		10	6		6	13
	chr3		20	13	43	45		65	59	35	58	52		32	41	59	38		42	62	57	27	56		8	12		11	14		14	6		15	10		13	7		18	16
	deletions		6	7	22	27		34	33	19	32	29		15	23	30	19		22	27	24	14	27		5	8		8	7		8	1		10	7		9	5		10	9
	insertions		14	6	21	18		31	26	16	26	23		17	18	29	19		20	35	33	13	29		3	4		3	7		6	5		5	3		4	2		8	7
	chr4		19	8	33	30		53	57	30	56	46		42	37	47	27		34	46	43	21	41		0	2		9	10		8	7		5	4		9	7		7	9
	deletions		8	7	22	14		34	37	20	32	29		18	25	28	13		24	29	26	11	24		0	0		7	5		5	4		5	3		6	4		7	8
	insertions		11	1	11	16		19	20	10	24	17		24	12	19	14		10	17	17	10	17		0	2		2	5		3	3		0	1		3	3		0	1
	chr5		12	15	28	24		40	49	20	45	40		28	24	36	37		32	48	47	22	53		5	4		13	14		11	13		10	11		14	9		12	13
	deletions		5	8	12	10		13	24	8	22	16		11	11	13	15		15	20	25	10	25		3	3		10	10		9	10		8	6		5	5		5	8
	insertions		7	7	16	14		27	25	12	23	24		17	13	23	22		17	28	22	12	28		2	1		3	4		2	3		2	5		9	4		7	5
	chr6		11	10	34	39		52	60	28	55	36		29	25	41	24		25	41	37	22	39		10	6		15	17		10	13		13	12		13	9		11	12
	deletions		5	5	21	24		34	39	18	34	21		19	17	24	14		14	23	25	16	22		6	3		7	12		8	9		3	4		9	6		6	9
	insertions		6	5	13	15		18	21	10	21	15		10	8	17	10		11	18	12	6	17		4	3		8	5		2	4		10	8		4	3		5	3
	chr7		10	13	31	32		49	49	24	35	47		29	29	41	27		23	38	40	16	33		7	13		7	12		11	9		13	7		11	10		11	18
	deletions		7	6	21	17		25	32	19	21	28		13	17	24	14		16	19	22	10	16		1	7		4	6		8	8		9	4		7	8		5	8
	insertions		3	7	10	15		24	17	5	14	19		16	12	17	13		7	19	18	6	17		6	6		3	6		3	1		4	3		4	2		6	10
	chr8		8	6	21	22		39	37	25	43	27		27	21	36	17		15	29	20	7	29		7	3		5	3		10	7		12	4		7	5		8	15
	deletions		4	1	8	11		24	21	17	29	16		16	11	21	12		8	15	10	2	17		6	1		5	1		5	5		9	3		6	2		3	10
	insertions		4	5	13	11		15	16	8	14	11		11	10	15	5		7	14	10	5	12		1	2		0	2		5	2		3	1		1	3		5	5
	chr9		7	6	17	23		40	37	16	38	26		21	25	28	26		27	30	24	18	32		4	6		12	14		15	12		13	10		15	9		7	12
	deletions		1	1	6	12		19	16	6	19	15		11	13	17	17		11	18	12	7	19		4	4		10	7		6	7		7	8		9	5		5	4
	insertions		6	5	11	11		21	21	10	19	11		10	12	11	9		16	12	12	11	13		0	2		2	7		9	5		6	2		6	4		2	8
	chr10		7	10	24	27		37	29	19	38	31		20	26	35	30		25	32	31	12	24		7	4		11	13		12	14		11	10		12	15		13	18
	deletions		6	10	15	18		27	18	13	23	21		11	18	24	21		12	21	19	6	15		4	1		10	9		5	9		8	7		8	10		9	12
	insertions		1	0	9	9		10	11	6	15	10		9	8	11	9		13	11	12	6	9		3	3		1	4		7	5		3	3		4	5		4	6
	chr11		15	14	28	30		42	41	34	42	39		33	25	37	24		28	37	38	22	48		12	12		16	20		20	15		16	16		15	16		12	20
	deletions		9	8	17	13		29	27	19	31	24		21	15	23	12		17	20	26	16	31		8	9		11	11		14	10		8	11		10	14		8	13
	insertions		6	6	11	17		13	14	15	11	15		12	10	14	12		11	17	12	6	17		4	3		5	9		6	5		8	5		5	2		4	7
	chr12		14	19	42	47		59	64	37	55	54		44	45	66	44		39	59	47	28	63		9	8		14	12		15	10		13	15		20	18		17	21
	deletions		9	11	22	27		36	35	17	31	30		21	20	34	23		19	30	25	11	36		6	6		8	10		8	8		8	11		11	13		10	9
	insertions		5	8	20	20		23	29	20	24	24		23	25	32	21		20	29	22	17	27		3	2		6	2		7	2		5	4		9	5		7	12
	chr13		4	6	13	14		27	23	15	25	28		10	12	18	15		19	21	23	10	22		3	2		2	4		2	3		3	1		5	3		5	3
	deletions		2	2	6	9		13	14	9	13	13		7	5	12	11		13	13	13	6	11		2	1		2	2		2	1		2	1		3	1		3	1
	insertions		2	4	7	5		14	9	6	12	15		3	7	6	4		6	8	10	4	11		1	1		0	2		0	2		1	0		2	2		2	2
	chr14		9	7	24	27		43	36	22	35	26		29	22	37	23		27	30	32	5	38		1	4		7	8		8	6		5	5		14	10		7	10
	deletions		3	5	10	16		27	23	15	20	16		16	10	17	9		17	17	18	5	20		1	2		5	5		4	1		3	2		11	7		2	5
	insertions		6	2	14	11		16	13	7	15	10		13	12	20	14		10	13	14	0	18		0	2		2	3		4	5		2	3		3	3		5	5
	chr15		7	4	19	21		31	29	20	26	22		18	26	30	18		13	23	25	6	19		5	2		7	11		8	7		6	8		8	3		6	7
	deletions		4	3	14	13		17	18	16	17	14		13	16	21	10		9	17	18	5	12		2	0		6	7		5	2		6	3		6	2		4	4
	insertions		3	1	5	8		14	11	4	9	8		5	10	9	8		4	6	7	1	7		3	2		1	4		3	5		0	5		2	1		2	3
	chr16		4	3	15	14		26	18	12	22	13		12	14	21	15		12	12	12	13	23		8	7		8	8		2	10		9	6		7	5		10	13
	deletions		3	0	9	7		16	12	7	15	10		7	7	7	7		9	7	7	8	16		6	5		4	5		2	6		7	3		5	4		3	7
	insertions		1	3	6	7		10	6	5	7	3		5	7	14	8		3	5	5	5	7		2	2		4	3		0	4		2	3		2	1		7	6
	chr17		11	11	31	31		43	41	29	37	40		32	31	42	29		27	36	31	19	29		24	19		26	28		19	21		23	23		26	20		18	22
	deletions		7	5	18	16		25	27	15	24	22		16	16	20	13		15	24	23	11	18		16	12		20	22		13	17		13	14		18	15		7	8
	insertions		4	6	13	15		18	14	14	13	18		16	15	22	16		12	12	8	8	11		8	7		6	6		6	4		10	9		8	5		11	14
	chr18		8	5	8	8		24	22	16	22	19		12	10	14	7		8	19	12	11	14		2	1		3	3		3	3		4	2		5	2		4	4
	deletions		1	1	2	0		10	9	7	9	7		5	3	4	1		1	7	1	3	4		1	1		1	0		1	1		0	0		2	2		2	0
	insertions		7	4	6	8		14	13	9	13	12		7	7	10	6		7	12	11	8	10		1	0		2	3		2	2		4	2		3	0		2	4
	chr19		16	12	28	28		20	21	15	29	22		16	14	22	14		10	26	29	12	20		11	15		17	16		16	15		13	16		26	21		12	21
	deletions		12	10	14	12		10	10	6	13	9		9	9	11	9		5	16	11	7	11		2	8		11	10		11	7		7	10		16	12		7	12
	insertions		4	2	14	16		10	11	9	16	13		7	5	11	5		5	10	18	5	9		9	7		6	6		5	8		6	6		10	9		5	9
	chr20		8	5	14	14		15	13	5	14	12		7	6	6	5		4	10	10	3	10		9	5		7	5		5	4		8	7		7	4		12	7
	deletions		5	2	10	10		8	5	3	7	6		4	3	3	3		2	8	8	1	8		6	2		4	5		3	2		6	5		5	0		8	5
	insertions		3	3	4	4		7	8	2	7	6		3	3	3	2		2	2	2	2	2		3	3		3	0		2	2		2	2		2	4		4	2
	chr21		2	2	9	13		11	13	9	13	10		14	11	12	7		7	15	9	7	14		2	5		5	3		5	4		5	1		4	6		2	3
	deletions		2	1	7	5		5	7	4	7	6		9	8	9	4		2	9	4	3	7		0	2		4	2		3	3		4	1		2	5		1	2
	insertions		0	1	2	8		6	6	5	6	4		5	3	3	3		5	6	5	4	7		2	3		1	1		2	1		1	0		2	1		1	1
	chr22		3	1	5	8		8	8	5	8	13		10	8	10	8		7	15	13	11	10		9	8		7	11		8	6		8	3		8	6		5	6
	deletions		1	1	4	3		6	5	3	6	9		7	5	4	3		5	12	10	7	8		6	5		6	9		6	5		6	2		5	3		3	4
	insertions		2	0	1	5		2	3	2	2	4		3	3	6	5		2	3	3	4	2		3	3		1	2		2	1		2	1		3	3		2	2
	chrX		2	3	6	7		13	12	4	7	7		16	12	21	16		10	21	15	12	20		2	3		7	5		2	4		3	4		3	2		4	2
	deletions		0	0	2	3		8	7	2	3	5		8	7	10	8		6	13	7	5	12		2	2		4	2		1	1		2	1		2	1		3	1
	insertions		2	3	4	4		5	5	2	4	2		8	5	11	8		4	8	8	7	8		0	1		3	3		1	3		1	3		1	1		1	1
	chrY		0	0	0	0		1	1	1	0	0		0	0	0	0		0	0	0	0	0		0	0		0	0		0	0		0	0		0	0		0	0
	deletions		0	0	0	0		0	1	1	0	0		0	0	0	0		0	0	0	0	0		0	0		0	0		0	0		0	0		0	0		0	0
	insertions		0	0	0	0		1	0	0	0	0		0	0	0	0		0	0	0	0	0		0	0		0	0		0	0		0	0		0	0		0	0
SNP calling	raw SNPs	14926.5	12040	12242	14933	15650		16289	16215	14907	16229	16410		14605	14568	15233	14541		15043	16567	16701	14857	16313		10754	11150		14669	15553		14978	14110		15628	14888		16711	15777		14703	15530
	in DBsnp	13705.3	11192	11373	13857	14519		14928	14841	13663	14921	15105		13561	13496	14114	13460		13915	15280	15418	13736	15036		9787	10118		13372	14128		13640	12939		14088	13606		14994	14267		13579	14225
	unknown	1221.2	848	869	1076	1131		1361	1374	1244	1308	1305		1044	1072	1119	1081		1128	1287	1283	1121	1277		967	1032		1297	1425		1338	1171		1540	1282		1717	1510		1124	1305
	% dbNP	91.8186
	filtered SNPs	6356.5	4790	4105	7331	3573		3704	5358	2392	13597	4027		8604	8070	7157	5507		7502	8687	8902	8315	14904		2588	4199		7992	7220		4565	4229		5594	5447		6590	4507		3489	7750
	in DBsnp	6304.97	4777	4082	7314	3570		3693	5339	2388	13479	4020		8590	8036	7128	5487		7467	8653	8865	8302	14140		2578	4161		7926	7177		4549	4214		5560	5434		6536	4483		3479	7722
	unknown	51.5333	13	23	17	3		11	19	4	118	7		14	34	29	20		35	34	37	13	764		10	38		66	43		16	15		34	13		54	24		10	28
	% dbNP	99.1893

## Sheet: PE
Supplementary Table 2: Kabuki study summary (PE reads)
		Mean	SRR063843	SRR063852		SRR063847	SRR063848		SRR063845	SRR063849		SRR063846	SRR063850		SRR063844	SRR063851		SRR063945	SRR063946
Statistics	Genome Size	3101804741	3101804741	3101804741		3101804741	3101804741		3101804741	3101804741		3101804741	3101804741		3101804741	3101804741		3101804741	3101804741
	Exome Size	30711874	30711874	30711874		30711874	30711874		30711874	30711874		30711874	30711874		30711874	30711874		30711874	30711874
	No. Input Reads	4.27521e+07	39089804	46427334		50928566	45451904		53923062	35082346		53422770	3346848		55431678	25175386		52057832	52687314
	Genome Fold Coverage	1.04751	0.957773	1.13756		1.24784	1.11366		1.32122	0.859583		1.30896	0.082004		1.35818	0.616844		1.27551	1.29094
	Exome Fold Coverage	17.4937	12.0891	15.2227		22.8915	19.7091		20.5233	13.1819		21.3362	1.33064		23.0617	10.3284		25.0463	25.2034
	Exome Capture Specificity	0.30275	0.2847	0.2853		0.3106	0.3101		0.2731	0.276		0.2823	0.295		0.3217	0.3264		0.3343	0.3335
	Low Covered Exons (<=6)	0.386254	0.5771	0.5462		0.2353	0.260751		0.2787	0.3605		0.2672	0.9209		0.2747	0.4465		0.2333	0.2339
	Low covered exons (<1x coverage)	0.250422	0.394233	0.366839		0.146639	0.158813		0.178507	0.218088		0.1605	0.685558		0.157312	0.245283		0.146373	0.146917
	Well covered exons (>=20x coverage)	0.176569	0.0989103	0.142177		0.265824	0.199971		0.223334	0.0719677		0.237528	0.000101209		0.260798	0.0344953		0.289883	0.293842
Trimming	Trimmed _R1	0	0	0		0	0		0	0		0	0		0	0		0	0
	Trimmed _R2	0	0	0		0	0		0	0		0	0		0	0		0	0
	Not Trimmed _R1	2.1376e+07	19544902	23213667		25464283	22725952		26961531	17541173		26711385	1673424		27715839	12587693		26028916	26343657
	Not Trimmed _R2	2.1376e+07	19544902	23213667		25464283	22725952		26961531	17541173		26711385	1673424		27715839	12587693		26028916	26343657
Min Length Filter	Pairs Passed	2.1376e+07	19544902	23213667		25464283	22725952		26961531	17541173		26711385	1673424		27715839	12587693		26028916	26343657
	Pairs Passed [% RR]	1	1	1		1	1		1	1		1	1		1	1		1	1
	Pairs Failed	0	0	0		0	0		0	0		0	0		0	0		0	0
	Pairs Failed [% RR]	0	0	0		0	0		0	0		0	0		0	0		0	0
N Max Filter	Pairs Passed	2.1376e+07	19544902	23213667		25464283	22725952		26961531	17541173		26711385	1673424		27715839	12587693		26028916	26343657
	Pairs Passed [% RR]	1	1	1		1	1		1	1		1	1		1	1		1	1
	Pairs Failed	0	0	0		0	0		0	0		0	0		0	0		0	0
	Pairs Failed [% RR]	0	0	0		0	0		0	0		0	0		0	0		0	0
Quality Filter	Pairs Passed	2.1376e+07	19544902	23213667		25464283	22725952		26961531	17541173		26711385	1673424		27715839	12587693		26028916	26343657
	Pairs Passed [% RR]	1	1	1		1	1		1	1		1	1		1	1		1	1
	Pairs Failed	0	0	0		0	0		0	0		0	0		0	0		0	0
	Pairs Failed [% RR]	0	0	0		0	0		0	0		0	0		0	0		0	0
Preproc. reads		4.27521e+07	39089803	46427334		50928566	45451904		53923061	35082346		53422770	3346848		55431678	25175386		52057832	52687314
Mapping Filter	Reads Passed	2.32329e+07	17162019	21560056		29786629	25681087		30369382	19302928		30539177	1822955		28972877	12788841		30271758	30537477
	Reads Passed [% RR]	0.539575	0.439	0.4644		0.5849	0.565		0.5632	0.5502		0.5717	0.5447		0.5227	0.508		0.5815	0.5796
	Reads Passed [% FR]	0.539575	0.439	0.4644		0.5849	0.565		0.5632	0.5502		0.5717	0.5447		0.5227	0.508		0.5815	0.5796
	Reads Failed	19519138	21927784	24867278		21141937	19770817		23553679	15779418		22883593	1523893		26458801	12386545		21786074	22149837
	Reads Failed [% RR]	0.460425	0.561	0.5356		0.4151	0.435		0.4368	0.4498		0.4283	0.4553		0.4773	0.492		0.4185	0.4204
	Reads Failed [% FR]	0.460425	0.561	0.5356		0.4151	0.435		0.4368	0.4498		0.4283	0.4553		0.4773	0.492		0.4185	0.4204
Proper-Paired Filter	Reads Passed	1.84272e+07	13037357	16619634		23877546	20478628		23907785	15126246		23991918	1418466		23214458	10187788		24537090	24729618
	Reads Passed [% RR]	0.426883	0.3335	0.358		0.4688	0.4506		0.4434	0.4312		0.4491	0.4238		0.4188	0.4047		0.4713	0.4694
	Reads Passed [% FR]	0.426883	0.3335	0.358		0.4688	0.4506		0.4434	0.4312		0.4491	0.4238		0.4188	0.4047		0.4713	0.4694
	Reads Failed	4805721	4124662	4940422		5909083	5202459		6461597	4176682		6547259	404489		5758419	2601053		5734668	5807859
	Reads Failed [% RR]	0.1127	0.1055	0.1064		0.116	0.1145		0.1198	0.1191		0.1226	0.1209		0.1039	0.1033		0.1102	0.1102
	Reads Failed [% FR]	0.1127	0.1055	0.1064		0.116	0.1145		0.1198	0.1191		0.1226	0.1209		0.1039	0.1033		0.1102	0.1102
Duplicate Filter	Reads Passed	1.77855e+07	12581315	15899526		23214802	19987718		23079281	14776532		22785954	1410540		22538920	10053550		23470806	23626646
	Reads Passed [% RR]	0.413533	0.3219	0.3425		0.4558	0.4398		0.428	0.4212		0.4265	0.4215		0.4066	0.3993		0.4509	0.4484
	Reads Passed [% FR]	0.413533	0.3219	0.3425		0.4558	0.4398		0.428	0.4212		0.4265	0.4215		0.4066	0.3993		0.4509	0.4484
	Reads Failed	641745	456042	720108		662744	490910		828504	349714		1205964	7926		675538	134238		1066284	1102972
	Reads Failed [% RR]	0.0133583	0.0117	0.0155		0.013	0.0108		0.0154	0.01		0.0226	0.0024		0.0122	0.0053		0.0205	0.0209
	Reads Failed [% FR]	0.0133583	0.0117	0.0155		0.013	0.0108		0.0154	0.01		0.0226	0.0024		0.0122	0.0053		0.0205	0.0209
Est. PCR dups. by chance		0.0892667	0.041	0.0816		0.1182	0.075		0.1485	0.0266		0.1431	0		0.1658	0.0071		0.129	0.1353
Exome Filter	Reads Passed	7.06926e+06	4885231	6151553		9250551	7964537		8293551	5326857		8622047	537717		9319312	4173744		10121290	10184786
	Reads Passed [% RR]	0.163633	0.125	0.1325		0.1816	0.1752		0.1538	0.1518		0.1614	0.1607		0.1681	0.1658		0.1944	0.1933
	Reads Passed [% FR]	0.163633	0.125	0.1325		0.1816	0.1752		0.1538	0.1518		0.1614	0.1607		0.1681	0.1658		0.1944	0.1933
	Reads Failed	1.07162e+07	7696084	9747973		13964251	12023181		14785730	9449675		14163907	872823		13219608	5879806		13349516	13441860
	Reads Failed [% RR]	0.249892	0.1969	0.21		0.2742	0.2645		0.2742	0.2694		0.2651	0.2608		0.2385	0.2336		0.2564	0.2551
	Reads Failed [% FR]	0.249892	0.1969	0.21		0.2742	0.2645		0.2742	0.2694		0.2651	0.2608		0.2385	0.2336		0.2564	0.2551
DIP calling	sum	402.667	370	472		479	470		387	304		440	19		547	246		544	554
	deletions	225.167	189	253		265	261		213	182		270	15		310	142		306	296
	insertions	177.5	181	219		214	209		174	122		170	4		237	104		238	258
	Ass. in Refseq	401.333	370	472		479	469		386	302		436	19		544	246		541	552
	In coding reg.	150	208	251		145	164		130	140		137	19		170	123		166	147
	In genomic reg.	1.33333	0	0		0	1		1	2		4	0		3	0		3	2
	In intron reg.	229.5	147	195		307	283		237	147		274	0		346	107		339	372
	Unknown	1.33333	0	0		2	3		1	1		2	0		2	0		2	3
	In UTR reg.	20.5	15	26		25	19		18	14		23	0		26	16		34	30
	Del/Ins	1.48833	1.04	1.16		1.24	1.25		1.22	1.49		1.59	3.75		1.31	1.37		1.29	1.15
	chr1		35	40		51	42		28	22		49	3		53	26		54	53
	deletions		17	22		31	28		14	13		31	3		34	15		33	30
	insertions		18	18		20	14		14	9		18	0		19	11		21	23
	chr2		15	23		29	41		29	23		26	0		31	15		35	39
	deletions		7	8		17	21		17	13		15	0		15	9		22	19
	insertions		8	15		12	20		12	10		11	0		16	6		13	20
	chr3		14	19		26	22		21	13		23	0		23	12		27	32
	deletions		9	11		13	13		14	8		13	0		13	6		14	17
	insertions		5	8		13	9		7	5		10	0		10	6		13	15
	chr4		11	9		13	13		7	7		11	0		14	3		17	14
	deletions		3	4		7	7		5	4		7	0		9	2		12	9
	insertions		8	5		6	6		2	3		4	0		5	1		5	5
	chr5		9	14		18	18		12	12		15	1		24	8		17	18
	deletions		4	8		8	7		8	9		10	1		13	3		7	9
	insertions		5	6		10	11		4	3		5	0		11	5		10	9
	chr6		15	26		29	28		25	7		23	5		18	8		25	27
	deletions		10	15		17	16		15	3		9	2		9	5		14	18
	insertions		5	11		12	12		10	4		14	3		9	3		11	9
	chr7		16	21		20	20		20	24		29	0		26	8		29	34
	deletions		2	6		12	10		12	15		15	0		10	5		13	17
	insertions		14	15		8	10		8	9		14	0		16	3		16	17
	chr8		15	14		13	13		11	9		9	0		17	7		18	21
	deletions		8	10		6	10		6	4		4	0		12	3		12	14
	insertions		7	4		7	3		5	5		5	0		5	4		6	7
	chr9		20	20		20	26		16	8		23	3		27	13		26	23
	deletions		10	12		11	13		7	3		16	3		14	7		14	12
	insertions		10	8		9	13		9	5		7	0		13	6		12	11
	chr10		12	16		19	13		18	12		14	0		24	15		22	21
	deletions		7	11		11	10		10	8		9	0		15	11		17	15
	insertions		5	5		8	3		8	4		5	0		9	4		5	6
	chr11		20	26		23	25		21	19		24	1		32	14		26	34
	deletions		13	15		13	13		8	11		15	1		16	11		14	18
	insertions		7	11		10	12		13	8		9	0		16	3		12	16
	chr12		17	22		28	27		32	22		23	0		31	14		32	33
	deletions		8	11		17	16		20	13		15	0		13	9		16	20
	insertions		9	11		11	11		12	9		8	0		18	5		16	13
	chr13		4	2		6	6		6	4		6	0		4	3		6	4
	deletions		2	1		3	2		3	2		4	0		4	3		4	2
	insertions		2	1		3	4		3	2		2	0		0	0		2	2
	chr14		5	7		17	22		10	11		14	0		19	8		22	23
	deletions		2	5		11	12		5	5		9	0		14	5		11	12
	insertions		3	2		6	10		5	6		5	0		5	3		11	11
	chr15		16	12		17	13		9	12		19	0		23	9		18	20
	deletions		7	6		10	9		7	7		15	0		16	3		11	13
	insertions		9	6		7	4		2	5		4	0		7	6		7	7
	chr16		17	29		13	14		13	10		18	0		30	12		27	18
	deletions		10	17		7	7		6	7		10	0		20	11		15	9
	insertions		7	12		6	7		7	3		8	0		10	1		12	9
	chr17		39	44		40	42		32	28		34	1		47	18		38	45
	deletions		24	23		22	22		16	18		25	1		29	10		21	20
	insertions		15	21		18	20		16	10		9	0		18	8		17	25
	chr18		5	5		7	9		5	6		9	0		7	2		7	9
	deletions		4	4		2	3		1	2		3	0		3	1		2	2
	insertions		1	1		5	6		4	4		6	0		4	1		5	7
	chr19		46	64		43	30		32	26		28	3		42	20		49	35
	deletions		24	32		20	15		18	16		16	2		18	7		21	13
	insertions		22	32		23	15		14	10		12	1		24	13		28	22
	chr20		8	15		14	9		17	10		18	0		19	6		17	14
	deletions		4	8		9	6		8	8		14	0		14	4		12	9
	insertions		4	7		5	3		9	2		4	0		5	2		5	5
	chr21		3	3		13	9		8	7		10	2		14	5		11	13
	deletions		1	0		9	6		5	5		7	2		8	1		6	8
	insertions		2	3		4	3		3	2		3	0		6	4		5	5
	chr22		16	25		11	13		8	8		9	0		12	10		13	10
	deletions		7	15		7	9		6	7		5	0		5	5		11	5
	insertions		9	10		4	4		2	1		4	0		7	5		2	5
	chrX		12	16		9	15		7	4		5	0		10	10		8	14
	deletions		6	9		2	6		2	1		2	0		6	6		4	5
	insertions		6	7		7	9		5	3		3	0		4	4		4	9
	chrY		0	0		0	0		0	0		1	0		0	0		0	0
	deletions		0	0		0	0		0	0		1	0		0	0		0	0
	insertions		0	0		0	0		0	0		0	0		0	0		0	0
SNP calling	raw SNPs	17858	14568	15774		20107	19762		19480	18890		19829	6283		21498	19214		19484	19407
	in DBsnp	13602.4	11019	11830		15791	15081		15225	13591		15734	3433		16794	13425		15657	15649
	unknown	4255.58	3549	3944		4316	4681		4255	5299		4095	2850		4704	5789		3827	3758
	% dbSNP	76.1699
	filtered SNPs	7875.42	3539	3734		14847	10190		4818	2981		6840	3260		12649	5761		13115	12771
	in DBsnp	7753.75	3529	3730		14740	10155		4810	2980		6816	2480		12502	5726		12951	12626
	unknown	121.667	10	4		107	35		8	1		24	780		147	35		164	145
	% dbSNP	98.4551
